# Supplementary material for: A Cancer-Related microRNA Signature Shows Biomarker Utility in Multiple Myeloma
Source: MDPI journal article supplement (doi:10.3390/ijms222313144), 2021-12-05
Supplement: s1 [file s1]

**Table S1.** Primers used in real-time quantitative PCR (qPCR), for the relative quantification of the studied miRNAs.

| Direction | Amplified miRNA or snoRNA | Sequence (5'→3')          | Length (nt <sup>1</sup> ) | T <sub>m</sub> (°C) |
|-----------|---------------------------|---------------------------|---------------------------|---------------------|
| Forward   | miR-15a-5p                | TAGCAGCACATAATGGTTTGT     | 21                        | 54                  |
|           | miR-16-5p                 | TAGCAGCACGTAAATATTGGCG    | 22                        | 57                  |
|           | miR-21-5p                 | GTAGCTTATCAGACTGATGTTGAAA | 25                        | 54                  |
|           | miR-25-3p                 | ATTGCACTTGTCTCGGTCTGA     | 21                        | 58                  |
|           | miR-125b-5p               | TCCCTGAGACCCTAACTTGTGAA   | 23                        | 59                  |
|           | miR-155-5p                | AATGCTAATCGTGATAGGGGTAA   | 23                        | 55                  |
|           | miR-221-3p                | GCTACATTGTCTGCTGGGTTTCA   | 23                        | 60                  |
|           | miR-222-3p                | GAGCTACATCTGGCTACTGGGTAA  | 24                        | 60                  |
|           | miR-223-3p                | TGTCAGTTTGTCAAATACCCCAA   | 23                        | 56                  |
|           | <i>SNORD43</i>            | ACTTATTGACGGGCGGACA       | 19                        | 59                  |
|           | <i>SNORD48</i>            | TGATGATGACCCAGGTA ACTCT   | 23                        | 59                  |
| Reverse   | Universal primer          | GCGAGCACAGAATTAATACGAC    | 22                        | 56                  |

<sup>1</sup> Nucleotides.
